# Supplementary material
Source: PubMed Central journal article supplement (PMC3705596)
Supplement: cdd201332x1.pdf [file cdd201332x1.pdf]

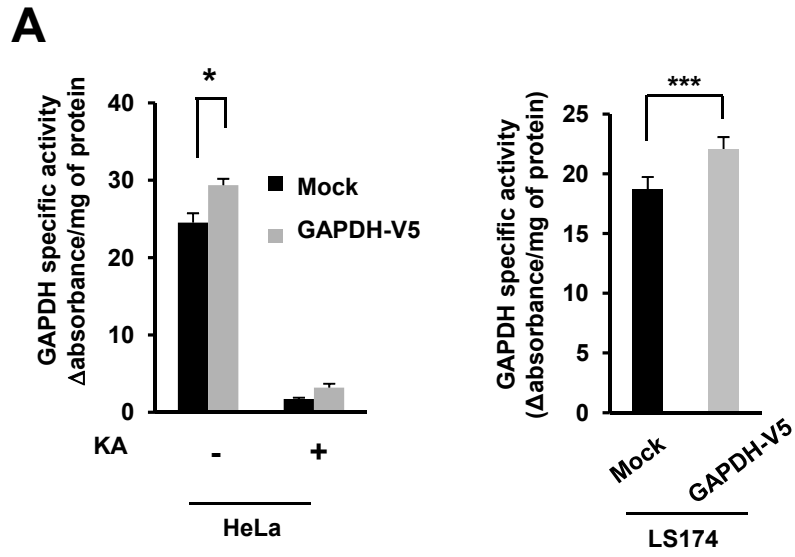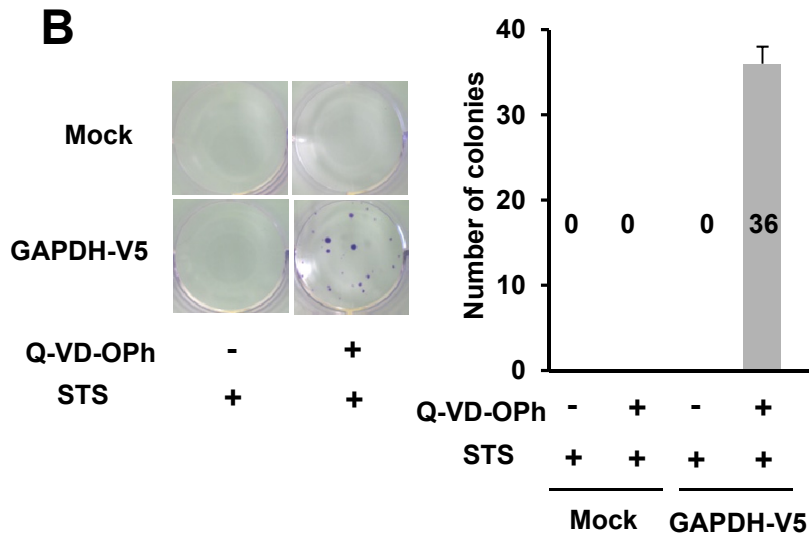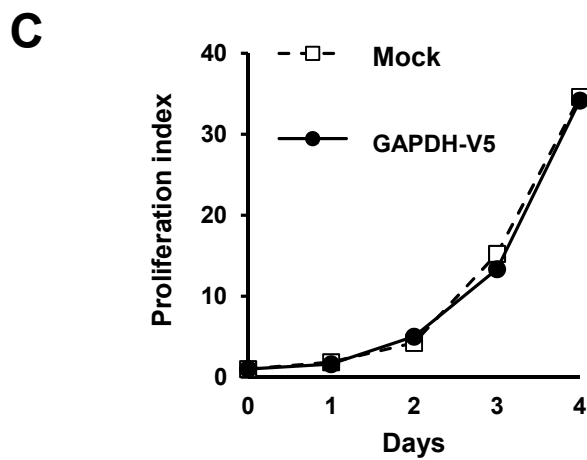

Supplemental Figure 1 (Jacquin MA et al)

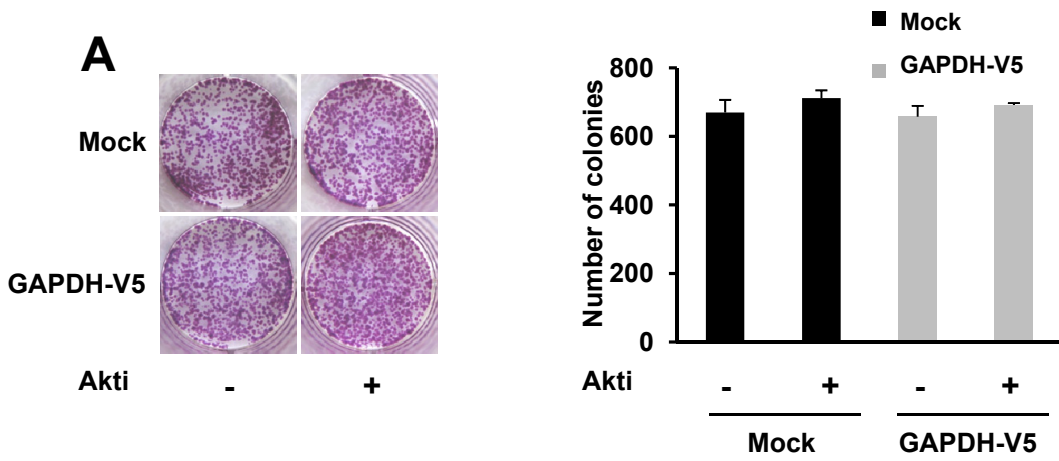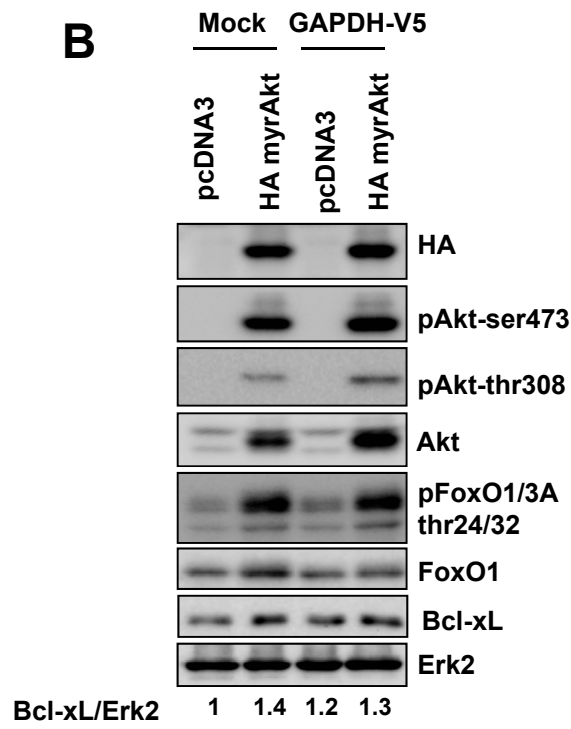

Supplemental Figure 2 (Jacquin MA et al)

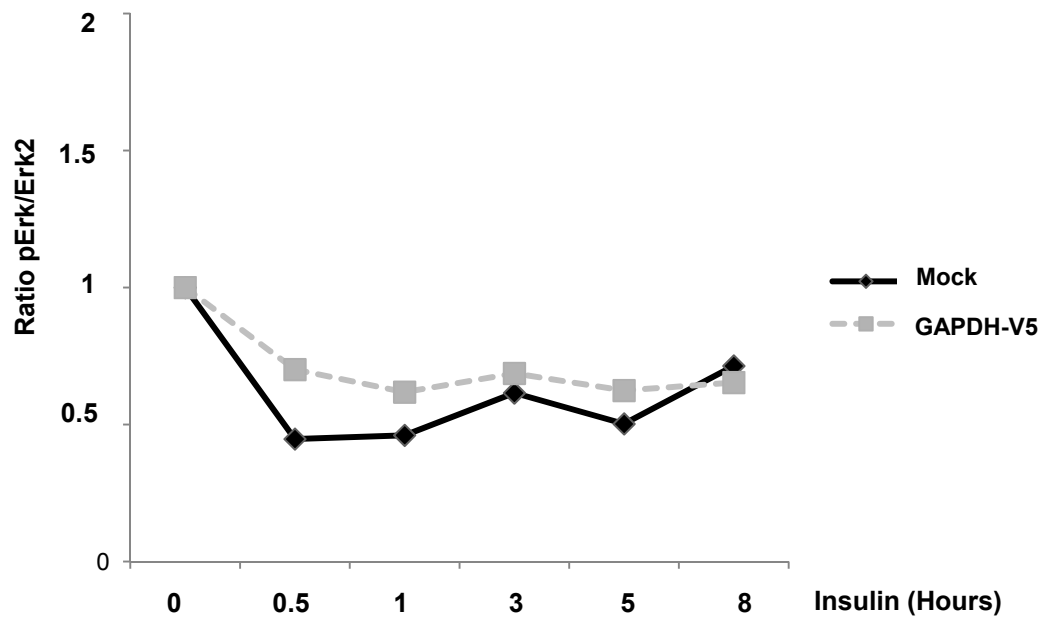

Supplemental Figure 3 (Jacquin MA et al)

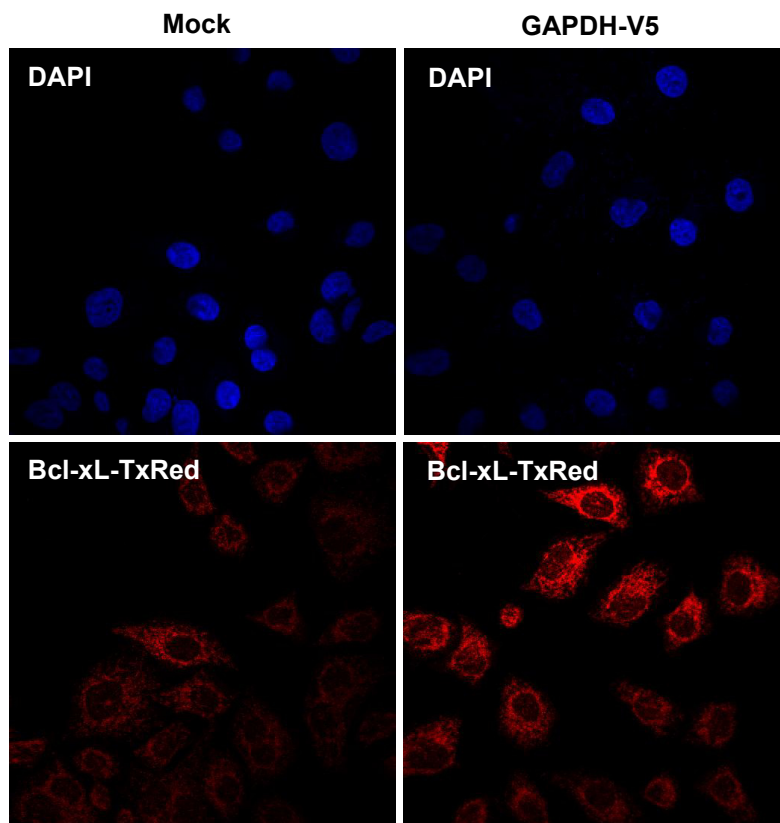

Supplemental Figure 4 (Jacquin MA et al)

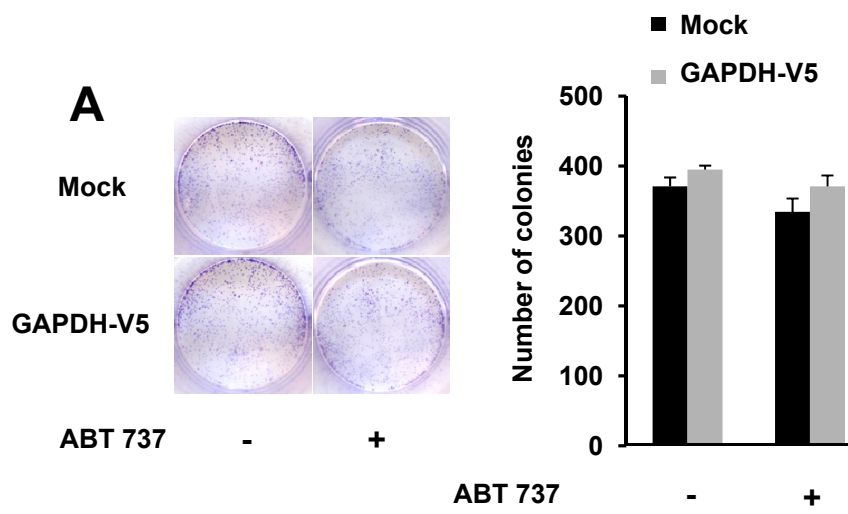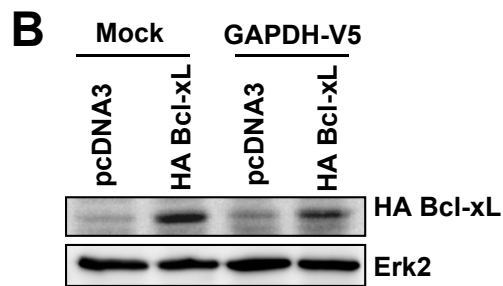

Supplemental Figure 5 (Jacquin MA et al)

**A**

■ SmacGFP  
 ■ GAPDH SmacGFP

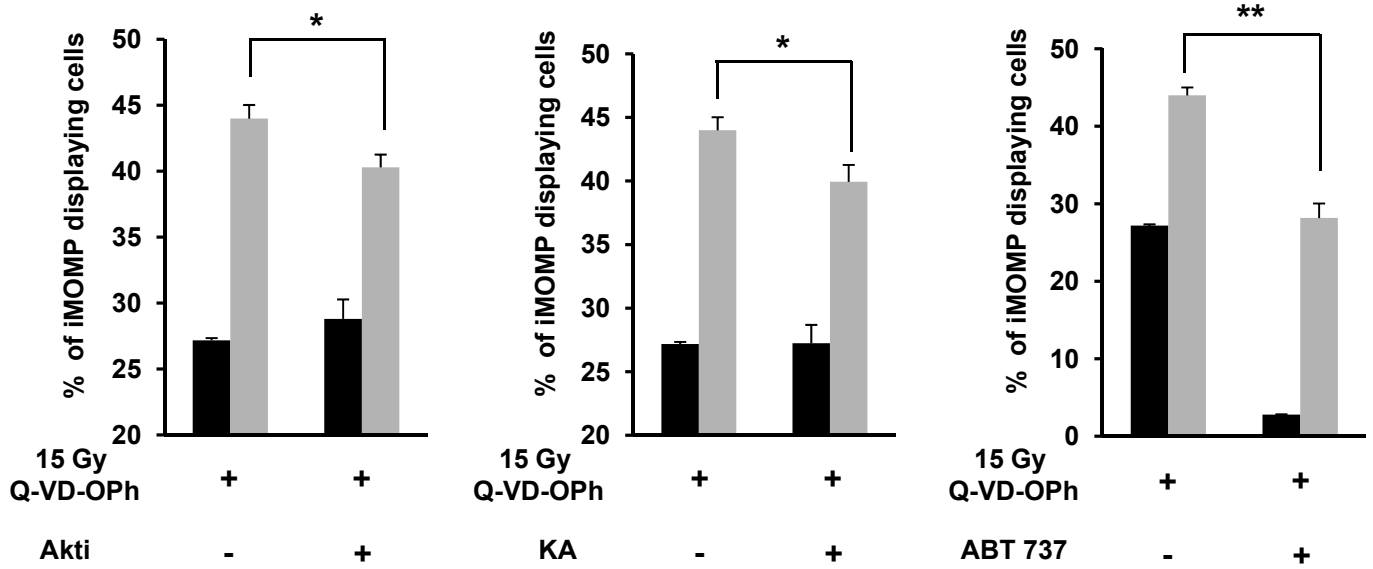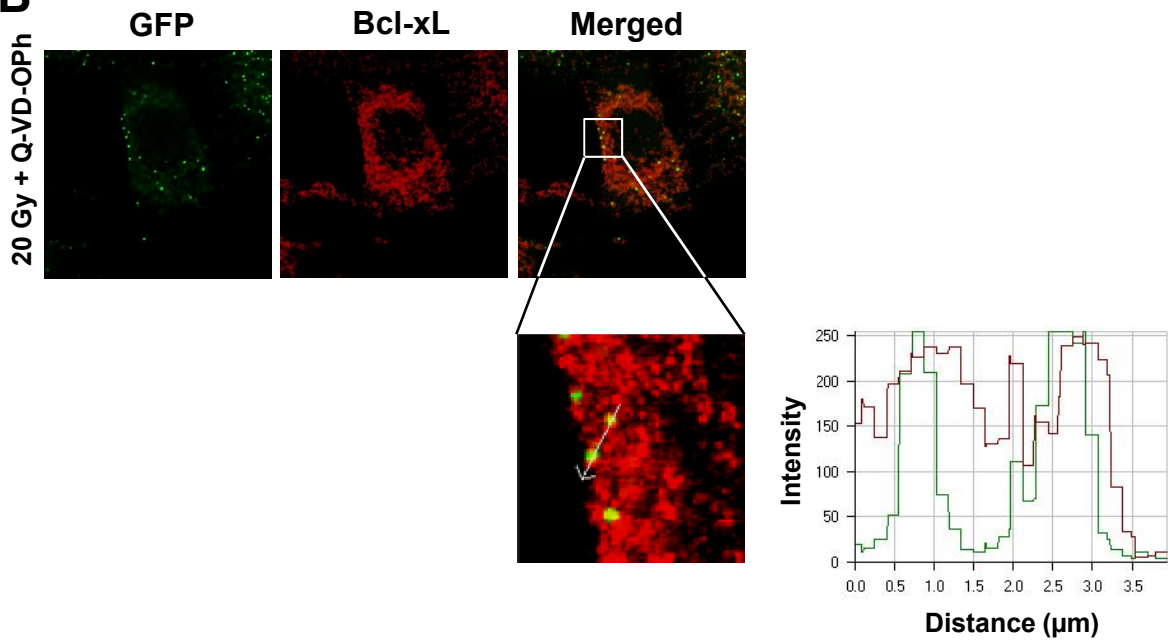

Supplemental Figure 6 (Jacquin MA et al)

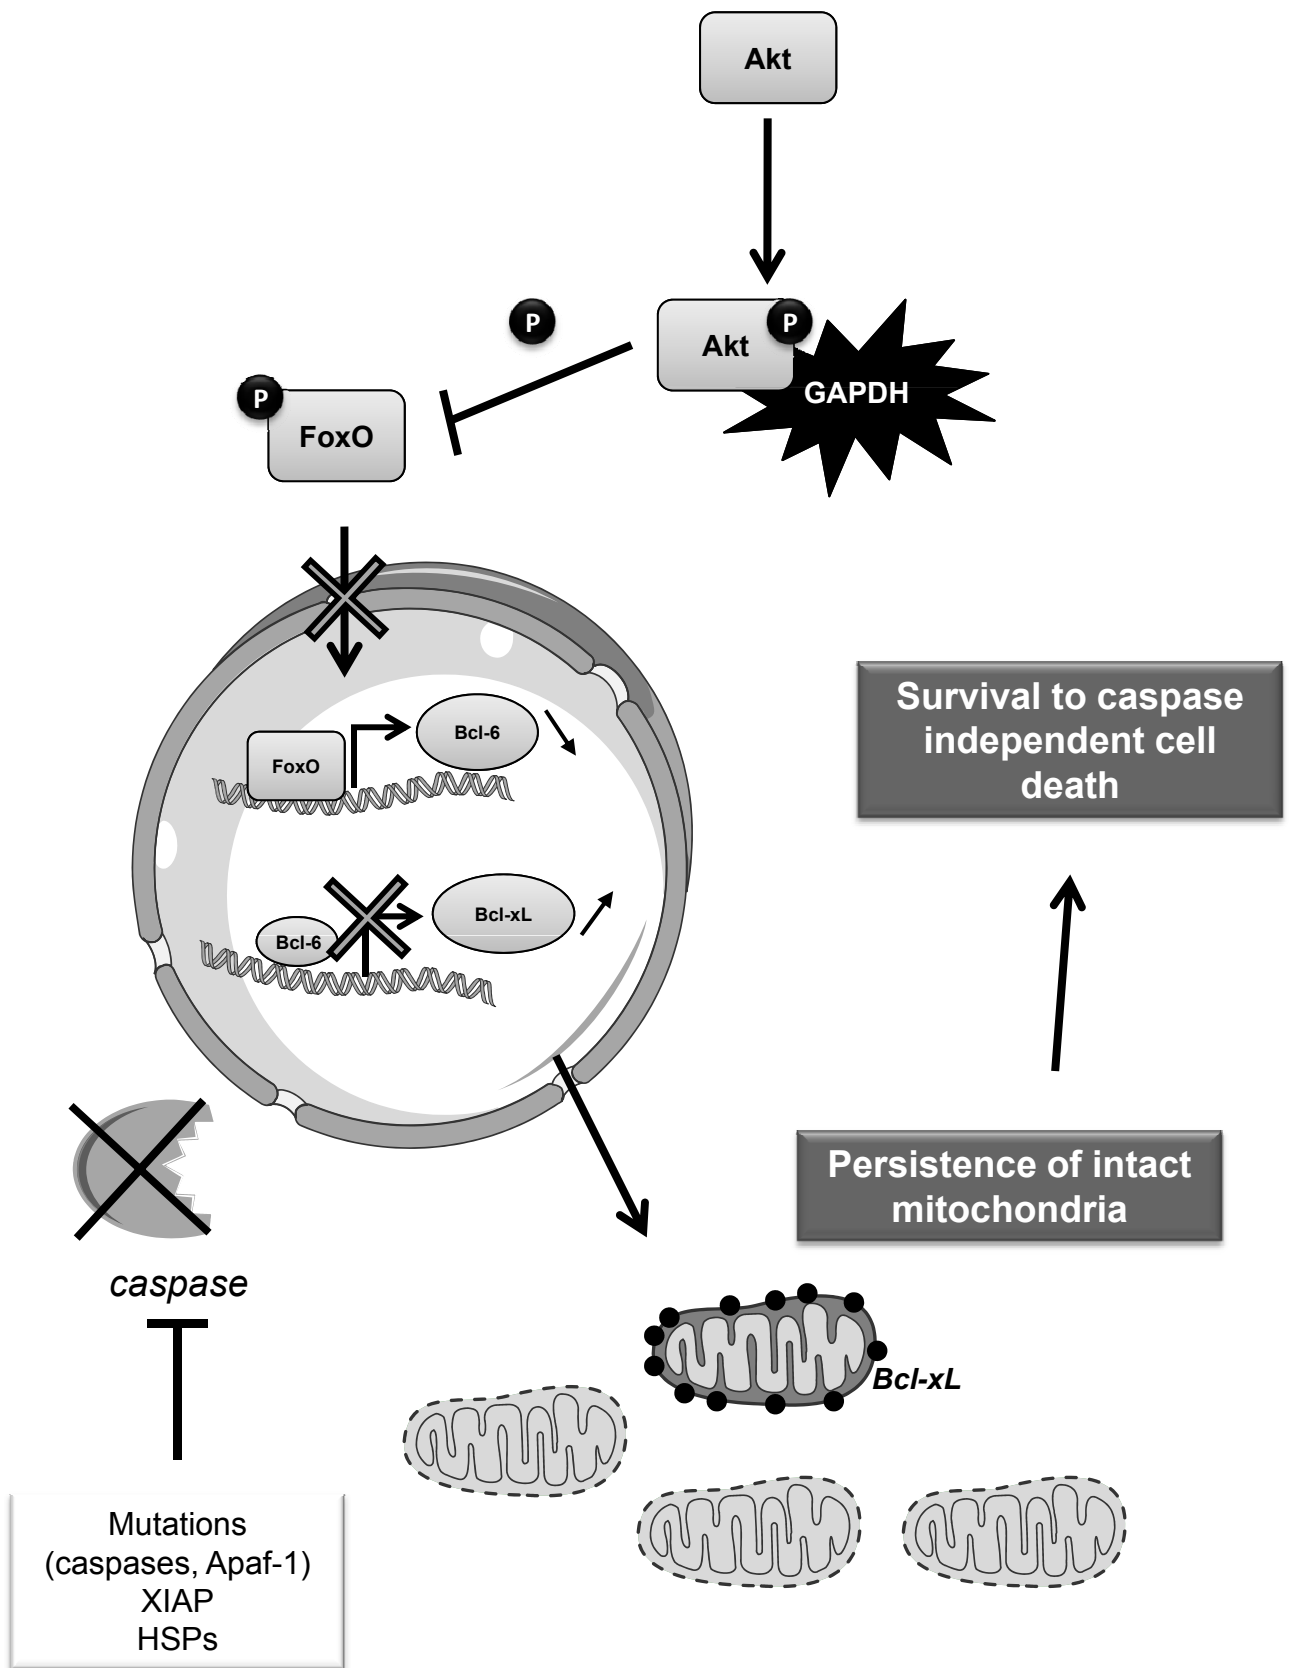

Supplemental Figure 7 (Jacquin MA et al)
